# Supplementary material
Source: publisher figshare collection journal article supplement (https://tandf.figshare.com/ndownloader/files/14502125)
Supplement: Supplementary file 1 [file 14502125]

**Table S1: Description of MTB** spoligotypes in Sahariya tribe and non-tribes

| **S. No.** | **SIT** | **Octal Code** | **Number of isolates (%)** | **Clade** |
| --- | --- | --- | --- | --- |
| **Sahariya Tribe** | | | | |
| **1** | 11 | 477777777413071 | 51 (46%) | EAI3_IND |
| **2** | 26 | 703777740003771 | 21 (19%) | CAS1_Delhi |
| **3** | 126 | 477777777413771 | 6 (5.4%) | EAI5 |
| **4** | 25 | 703777740003171 | 4 (3.6%) | CAS1_Delhi |
| **5** | 236 | 777777777413771 | 4 (3.6%) | EAI5 |
| **6** | 428 | 703777740003371 | 2 (1.8%) | CAS1_Delhi |
| **7** | 510 | 777777700003531 | 2 (1.8%) | U |
| **8** | 138 | 777777777413700 | 2 (1.8%) | EAI5 |
| **9** | 1680 | 475777777413071 | 1 (0.9%) | EAI3_IND |
| **10** | 654 | 477777737413071 | 1 (0.9%) | EAI3_IND |
| **11** | 48 | 777777777413731 | 1 (0.9%) | EAI1_SOM |
| **12** | 934 | 777777777413071 | 1 (0.9%) | EAI5 |
| **13** | 625 | 477777777412071 | 1 (0.9%) | EAI5 |
| **14** | 1427 | 457001777413771 | 1 (0.9%) | EAI5 |
| **15** | 1342 | 477777177413071 | 1 (0.9%) | EAI3_IND |
| **16** | 1405 | 703743740003771 | 1 (0.9%) | CAS1_Delhi |
| **17** | 1343 | 703737740003771 | 1 (0.9%) | CAS1_Delhi |
| **18** | 381 | 703777740003071 | 1 (0.9%) | CAS1_Delhi |
| **19** | 289 | 703777740003571 | 1 (0.9%) | CAS1_Delhi |
| **20** | 288 | 700377740003771 | 1 (0.9%) | CAS2 |
| **21** | 1199 | 703777740001171 | 1 (0.9%) | CAS |
| **22** | 357 | 703777740000771 | 1 (0.9%) | CAS |
| **Non-Tribe** | | | | |
| **1** | 26 | 703777740003771 | 30 (29.1%) | CAS1_Delhi |
| **2** | 11 | 477777777413071 | 29 (28.1%) | EAI3_IND |
| **3** | 25 | 703777740003171 | 8 (7.7%) | CAS1_Delhi |
| **4** | 288 | 700377740003771 | 4 (3.8%) | CAS2 |
| **5** | 625 | 477777777412071 | 3 (2.9%) | EAI5 |
| **6** | 357 | 703777740000771 | 3 (2.9%) | CAS |
| **7** | 236 | 777777777413771 | 2 (1.9%) | EAI5 |
| **8** | 1789 | 703777740000171 | 2 (1.9%) | CAS1_Delhi |
| **9** | 22 | 703777400001771 | 2 (1.9%) | CAS |
| **10** | 1 | 000000000003771 | 2 (1.9%) | Beijing |
| **11** | 269 | 000000000000771 | 1 (0.9%) | Beijing like |
| **12** | 126 | 477777777413771 | 1 (0.9%) | EAI5 |
| **13** | 138 | 777777777413700 | 1 (0.9%) | EAI5 |
| **14** | 1092 | 702777740003771 | 1 (0.9%) | CAS1_Delhi |
| **15** | 1343 | 703737740003771 | 1 (0.9%) | CAS1_Delhi |
| **16** | 429 | 703777740003731 | 1 (0.9%) | CAS1_Delhi |
| **17** | 428 | 703777740003371 | 1 (0.9%) | CAS1_Delhi |
| **18** | 1314 | 703737740003771 | 1 (0.9%) | CAS1_Delhi |
| **19** | 142 | 703777700003771 | 1 (0.9%) | CAS |
| **20** | 1390 | 777777747413371 | 1 (0.9%) | EAI5 |
| **21** | T1 | 777777777760771 | 1 (0.9%) | T1 |
